# Supplementary material for: EXAFS evidence for the spin–phonon coupling in the monoclinic PrNiO3 nickelate perovskite
Source: Royal Society of Chemistry journal article supplement (doi:10.1039/d2tc03063b), 2022-11-18
Supplement: d2tc03063b1.pdf [file d2tc03063b1.pdf]

## Supporting Information

# EXAFS evidence for the spin-phonon coupling in monoclinic PrNiO<sub>3</sub> nickelate perovskite

J. E. Rodrigues <sup>a,\*</sup>, A. D. Rosa <sup>a</sup>, J. López-Sánchez <sup>b,c</sup>, E. Sebastiani-Tofano <sup>b,c</sup>, N. M. Nemes <sup>d</sup>, J. L. Martínez <sup>b</sup>, J. A. Alonso <sup>b,\*</sup>, O. Mathon <sup>a</sup>

<sup>a</sup> *European Synchrotron Radiation Facility (ESRF), 71 Avenue des Martyrs, 38000 Grenoble, France.*

<sup>b</sup> *Instituto de Ciencia de Materiales de Madrid (ICMM), CSIC, Sor Juana Inés de la Cruz 3, E-28049 Madrid, Spain.*

<sup>c</sup> *Spanish CRG BM25-SpLine at the ESRF, 71 Avenue des Martyrs, 38000 Grenoble, France.*

<sup>d</sup> *Departamento Física de Materiales, Universidad Complutense de Madrid, E-28040 Madrid, Spain.*

\* **Correspondence:** [rodrigues.joaoliias@gmail.com](mailto:rodrigues.joaoliias@gmail.com); [ja.alonso@icmm.csic.es](mailto:ja.alonso@icmm.csic.es).

## EXAFS model for PrNiO<sub>3</sub> nickelate

### Structural aspects from XRD

PrNiO<sub>3</sub> nickelate is described at 10 K by the monoclinic space-group  $P2_1/n$ , being characterized by the charge disproportionation between Ni1 (Ni<sup>+3+ $\delta$</sup> ) and Ni2 (Ni<sup>+3- $\delta$</sup> ) sites, with the factor  $\delta \neq 0$  (see Fig. S1). When we evaluated the distances Ni–O, three sets of pair-distances for both Ni1 and Ni2 elucidating the occurrence of two octahedra with average distances  $\langle \text{Ni1–O} \rangle = 1.912(7)$  Å and  $\langle \text{Ni2–O} \rangle = 1.983(7)$  Å could be discriminated from high-resolution synchrotron X-ray diffraction.<sup>1</sup> The same data acquisition protocol was repeated at 295 K to characterize the orthorhombic  $Pbnm$  phase, showing instead three sets of Ni–O distances for the single Ni within the structure (average distance  $\langle \text{Ni–O} \rangle = 1.942(3)$  Å), due to the loss of the charge disproportionation above  $T = 130$  K. In addition, the octahedral unit [NiO<sub>6</sub>] does not have appreciated distortion, being more symmetric in the orthorhombic phase when compared to those from the monoclinic phase.

### Monoclinic unit-cell at 10 K

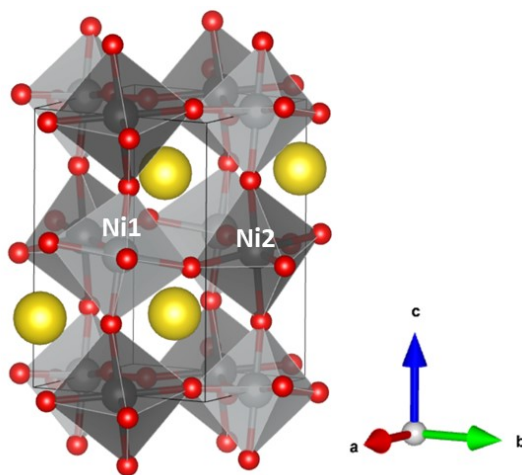

| <i>Monoclinic</i> $P2_1/n$     |            |                                |            |
|--------------------------------|------------|--------------------------------|------------|
| Ni1–O distance (R, Å)          |            | Ni2–O distance (R, Å)          |            |
| 2 × Ni1–O1                     | 1.875(7) Å | 2 × Ni2–O1                     | 2.011(7) Å |
| 2 × Ni1–O2                     | 1.974(7) Å | 2 × Ni2–O2                     | 1.947(7) Å |
| 2 × Ni1–O3                     | 1.887(7) Å | 2 × Ni2–O3                     | 1.990(7) Å |
| $\langle \text{Ni1–O} \rangle$ | 1.912(7) Å | $\langle \text{Ni2–O} \rangle$ | 1.983(7) Å |

**Fig. S1:** Representation of the monoclinic unit cell of PrNiO<sub>3</sub> at 10 K together with the list of pair-units Ni–O extracted from the structural refinement<sup>1</sup>.

### Orthorhombic unit-cell at 295 K

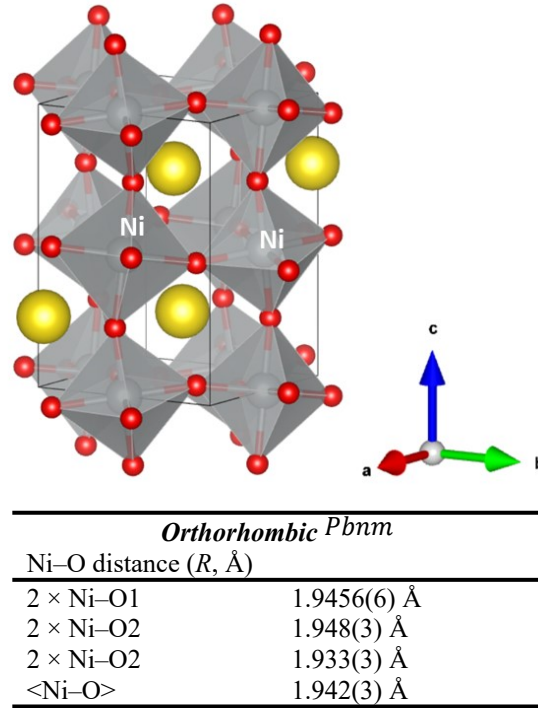

**Fig. S2:** Representation of the orthorhombic unit cell of  $\text{PrNiO}_3$  at 295 K together with the list of pair-units Ni–O extracted from the structural refinement <sup>1</sup>.

### Building the EXAFS model

To build our EXAFS model at 10 K (for the monoclinic phase), we have observed that 6 paths of Ni–O (multiplicity of 2 for each one) are needed for a precise structural description; however, such a description is not reasonable for a conventional EXAFS analysis in view of few factors, including spectral resolution, and available windows in  $k$  and  $R$  spaces. To overcome it, we considered that among the 6 paths (CN = 2 for each), we may define two sets of Ni–O distances, namely:  $\text{Ni}_a\text{–O}_{1a} \approx 1.89$  Å (CN = 2) and  $\text{Ni}_a\text{–O}_{2a} \approx 1.97$  Å (CN = 4) (see Table above for monoclinic unit-cell). We named both paths as  $\text{Ni}_a\text{–O}_{1a}$  and  $\text{Ni}_a\text{–O}_{2a}$  (see the main text), respectively. The definition of the coordination numbers (CN) was based on the distribution of pair-distances, e.g. the monoclinic phase has 4 pairs with  $R < 1.89$  Å, while 8 pairs have  $R > 1.89$  Å from the 12 pairs available. Then, after the insulator-metal transition, one may expect that both paths became equal with CN = 6, which is the feature of the orthorhombic phase  $Pbnm$ . Fig. S3 shows a sketch of the local structure around the Ni absorber for both monoclinic and orthorhombic phases, which culminated in the EXAFS model used here.

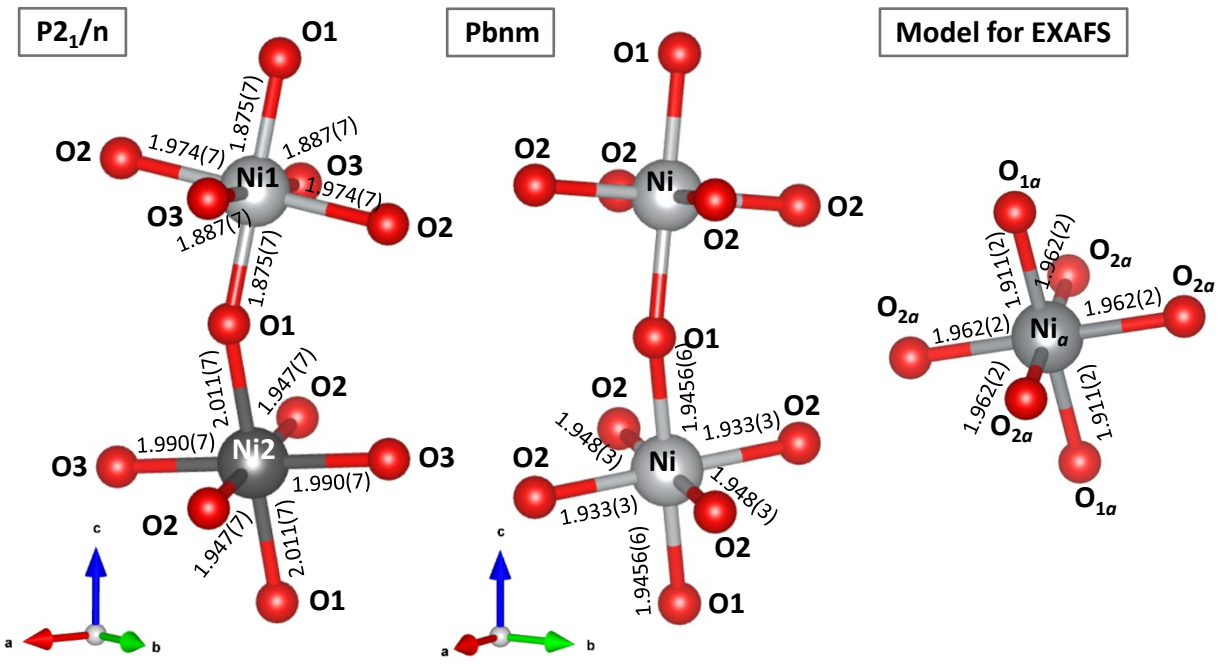

**Fig. S3:** Sketches of the local structure of PrNiO<sub>3</sub> nickelate in both monoclinic and orthorhombic crystal structures, highlighting the all the pair-units Ni–O. From this, an average octahedral unit was used as initial parameters to describe the EXAFS oscillations in PrNiO<sub>3</sub>.

## References

<sup>1</sup> J. E. Rodrigues, A. D. Rosa, G. Garbarino, C. Dejoie, Y. Mijiti, T. Irifune, N. M. Nemes J. L. Martínez, M. Mezouar, J. A. Alonso, O. Mathon. *In preparation*, 2022.
